# Supplementary material for: Impact of an interprofessional shared decision-making and goal-setting decision aid for patients with diabetes on decisional conflict – study protocol for a randomized controlled trial
Source: PubMed Central journal article supplement (PMC4486130; doi:10.1186/s13063-015-0797-8), 2015-06-27
Supplement: 13063_2015_797_MOESM1_ESM.pdf [file 13063_2015_797_MOESM1_ESM.pdf]

## Appendix 1: Methods: Recruitment Log Items

| Level of recruitment  | Stage of recruitment | Data Items                                                                                                                                                                                                                                |
|-----------------------|----------------------|-------------------------------------------------------------------------------------------------------------------------------------------------------------------------------------------------------------------------------------------|
| Site recruitment      | Enrollment           | FHT name<br>Method of contact<br>Email<br># email follow-up<br>Responded<br>Additional information provided<br>Presentation<br>Consented<br>Consented via<br>Reasons declined                                                             |
| Physician recruitment | Enrollment           | FHT name<br>Date initiated<br>#eligible physicians<br>Method of contact<br>Email<br># email follow-up<br>Responded<br>Additional information provided<br>Presentation<br>Consented<br>Consented via<br>Reasons declined<br>Date completed |

|                     |                  |                                                                                                                                                                                                                                                                                                                                                                                                                                                                                                                                                                                                                         |
|---------------------|------------------|-------------------------------------------------------------------------------------------------------------------------------------------------------------------------------------------------------------------------------------------------------------------------------------------------------------------------------------------------------------------------------------------------------------------------------------------------------------------------------------------------------------------------------------------------------------------------------------------------------------------------|
|                     | Allocation       | Allocated to<br>Baseline questionnaire<br>Received intervention<br># times tool used<br>Did not receive intervention<br>Reasons for not receiving                                                                                                                                                                                                                                                                                                                                                                                                                                                                       |
|                     | Follow-up        | Complete<br>6-month questionnaire completed<br>12-month questionnaire completed<br>Reasons lost                                                                                                                                                                                                                                                                                                                                                                                                                                                                                                                         |
| Patient recruitment | Identification   | FHT name<br>Date initiated<br>Physician name<br>Potentially eligible patients <ul style="list-style-type: none"> <li>- Number of rostered patients</li> <li>- Number of patients with diabetes</li> <li>- Number of patients with <math>\geq 2</math> comorbidities</li> </ul> Excluded patients <ul style="list-style-type: none"> <li>- Number of patients excluded</li> <li>- Do not speak English</li> <li>- Documented cognitive deficits</li> <li>- Unable to give informed consent</li> <li>- Limited life expectancy (&lt; 1year)</li> <li>- Not available for follow-up</li> <li>- Resident patient</li> </ul> |
|                     | Random selection | Date completed<br># eligible patients (randomized)<br># patients contacted                                                                                                                                                                                                                                                                                                                                                                                                                                                                                                                                              |
|                     | Enrollment       | Date mailed<br>Consent                                                                                                                                                                                                                                                                                                                                                                                                                                                                                                                                                                                                  |

|  |            |                                                                                                                                                                              |
|--|------------|------------------------------------------------------------------------------------------------------------------------------------------------------------------------------|
|  |            | <p>Consented via</p> <p>Reason declined</p> <p>Date phoned</p> <p>Result of phone call</p> <p>Link to consent sent on</p>                                                    |
|  | Allocation | <p>Allocated to</p> <p>Baseline questionnaire</p> <p>Received intervention</p> <p># times tool used</p> <p>Did not receive intervention</p> <p>Reasons for not receiving</p> |
|  | Follow-up  | <p>Complete</p> <p>6-month questionnaire completed</p> <p>12-month questionnaire completed</p> <p>Reasons lost</p>                                                           |
|  | Analysis   | <p>Included</p> <p>Excluded</p> <p>Reasons why</p>                                                                                                                           |
