# Supplementary material for: Impact of an interprofessional shared decision-making and goal-setting decision aid for patients with diabetes on decisional conflict – study protocol for a randomized controlled trial
Source: PubMed Central journal article supplement (PMC4486130; doi:10.1186/s13063-015-0797-8), 2015-06-27
Supplement: 13063_2015_797_MOESM2_ESM.pdf [file 13063_2015_797_MOESM2_ESM.pdf]

## Appendix 2: Methods: Website usage statistics

| Category                                       | Item                                             |
|------------------------------------------------|--------------------------------------------------|
| User type                                      | Patient<br>Family member<br>Health care provider |
| Number of times used over study period         | Total<br>By user type                            |
| Frequency of use over study period             | Total<br>By user type                            |
| Most frequently revisited pages (by returnees) | By user type                                     |
| Mean duration of use                           | Total<br>By page<br>By user type                 |
| Median duration of use                         | Total<br>By page<br>By user type                 |
